# Supplementary material for: Synbiotic supplementation containing Bifidobacterium infantis and xylooligosaccharides alleviates dextran sulfate sodium-induced ulcerative colitis
Source: Royal Society of Chemistry journal article supplement (doi:10.1039/d0fo00518e), 2020-01-01
Supplement: d0fo00518e1.pdf [file d0fo00518e1.pdf]

## Supplementary Data

### Synbiotic supplementation containing *Bifidobacterium infantis* and xylooligosaccharide alleviates dextran sulfate sodium-induced ulcerative colitis

Kangliang Sheng <sup>a,b,c</sup>, Shiman He <sup>a,b,c</sup>, Ming Sun <sup>a,b,c</sup>, Guanghui Zhang <sup>a,b,c</sup>, Xiaowei Kong <sup>a,b,c</sup>,  
Jingmin Wang <sup>a,b,c</sup>, Yongzhong Wang<sup>\*</sup>, <sup>a,b,c,d</sup>

<sup>a</sup> School of Life Sciences, Anhui University, Hefei 230601, Anhui, China.

<sup>b</sup> Key Laboratory of Human Microenvironment and Precision Medicine of Anhui Higher Education Institutes, Anhui University, Hefei 230601, Anhui, China.

<sup>c</sup> Anhui Key Laboratory of Modern Biomanufacturing, Hefei 230601, Anhui, China.

<sup>d</sup> Institute of Physical Science and Information Technology, Anhui University, Hefei 230601, Anhui, China.

**Tables: 1**

**Table S1** Oligonucleotide primers used for qRT-PCR

| Gene           | 5'-3' Primer sequence                                      |
|----------------|------------------------------------------------------------|
| TNF- $\alpha$  | F: ATGAGAAGTTCCCAAATGGC<br>R: CTCCACTTGGTGGTTTGCTA         |
| IL-1 $\beta$   | F: TGCCACCTTTTGACAGTGATG<br>R: AAGGTCCACGGGAAAGACAC        |
| IL-10          | F:GGACCAGCTGGACAACATACTGCTA<br>R: CCGATAAGGCTTGGCAACCCAAGT |
| NLRP3          | F: TGGAAGATTACCCGCCCGAGAA<br>R: TCCAGCAAACCCATCCACTCTTC    |
| Caspase-1      | F: TGAAAGACAAGCCCAAGGTGATC<br>R:CAATGAAAAGTGAGCCCCTGAC     |
| ASC            | F: CATCTTGTCTTGGCTGGTGGTCT<br>R: CGGACACGGACAGGATTGACA     |
| ZO-1           | F: TCTTCCATCATTTTCGCTGTGT<br>R: TCTGAAACCATCAAGTCCACA      |
| Occludin       | F: TCACTTTTCCTGCGGTGACT<br>R: GGGAACGTGGCCGATATAATG        |
| claudin-1      | F: ATGCAAAGATGTTTTGCCACAG<br>R: TACAAATTCCCATTGCAGCCC      |
| $\beta$ -actin | F: TGTCCACCTTCCAGCAGATGT<br>R: AGCTCAGTAACAGTCCGCCTAGA     |
